# Supplementary material for: Environmentally hazardous gas sensing ability of MoS2-nanotubes: an insight from the electronic structure and transport properties
Source: Royal Society of Chemistry journal article supplement (doi:10.1039/d0na01037e), 2021-01-01
Supplement: d0na01037e1.pdf [file d0na01037e1.pdf]

## Environmentally hazardous gas sensing ability of MoS<sub>2</sub>-nanotube: An insight from electronic structure and transport properties

Nabajyoti Baildya<sup>\*a</sup>, Narendra Nath Ghosh<sup>b</sup> and Asoke P. Chattopadhyay<sup>a</sup>

<sup>a</sup>Department of Chemistry

University of Kalyani, Kalyani 741235, India

<sup>b</sup>Department of Chemistry

University of Gour Banga, Mokdumpur, Malda, 732103, India

Email: nabajyotibaildya@gmail.com, ghosh.naren13@gmail.com, asoke@klyuniv.ac.in

Table S1: Adsorption energies of different gases on MoS<sub>2</sub>-NT

| System                                | Energy of gas adsorbed MoS <sub>2</sub> -NT at different sites (eV) |           |           |           | Energy of MoS <sub>2</sub> -NT (eV) | Energy of gas (eV) | Adsorption energy at different sites (eV) |        |        |        |
|---------------------------------------|---------------------------------------------------------------------|-----------|-----------|-----------|-------------------------------------|--------------------|-------------------------------------------|--------|--------|--------|
|                                       | H-site                                                              | B-site    | M-site    | S-site    |                                     |                    | H-site                                    | B-site | M-site | S-site |
| MoS <sub>2</sub> -NT@CO               | -64310.30                                                           | -64310.09 | -64310.12 | -64310.03 | -63703.26                           | -606.60            | -0.44                                     | -0.23  | -0.26  | -0.17  |
| MoS <sub>2</sub> -NT@CO <sub>2</sub>  | -64757.93                                                           | -64758.01 | -64757.97 | -64758.03 | -63703.26                           | -1054.65           | -0.02                                     | -0.10  | -0.06  | -0.12  |
| MoS <sub>2</sub> -NT@NH <sub>3</sub>  | -64031.46                                                           | -64031.97 | -64032.24 | -64031.52 | -63703.26                           | -328.04            | -0.16                                     | -0.67  | -0.94  | -0.22  |
| MoS <sub>2</sub> -NT@H <sub>2</sub> O | -64181.88                                                           | -64182.81 | -64183.26 | -64182.06 | -63703.26                           | -478.26            | -0.36                                     | -1.29  | -1.74  | -0.54  |

Table S2: Comparison of adsorption energies of MoS<sub>2</sub>-ML and MoS<sub>2</sub>-NT

| System                                | Adsorption energy of MoS <sub>2</sub> -ML@gas (eV) [1] | Highest adsorption Energy of MoS <sub>2</sub> -NT@gas (eV) |
|---------------------------------------|--------------------------------------------------------|------------------------------------------------------------|
| MoS <sub>2</sub> -NT@CO               | -0.0067                                                | -0.44                                                      |
| MoS <sub>2</sub> -NT@CO <sub>2</sub>  | -0.0072                                                | -0.12                                                      |
| MoS <sub>2</sub> -NT@NH <sub>3</sub>  | -0.0100                                                | -0.94                                                      |
| MoS <sub>2</sub> -NT@H <sub>2</sub> O | -0.0267                                                | -1.74                                                      |

Table S3: Mulliken charges on MoS<sub>2</sub>-NT adsorbed gases

| System                                | Mulliken charges |
|---------------------------------------|------------------|
| MoS <sub>2</sub> -NT@CO               | -0.08e           |
| MoS <sub>2</sub> -NT@CO <sub>2</sub>  | -0.07e           |
| MoS <sub>2</sub> -NT@NH <sub>3</sub>  | 0.25e            |
| MoS <sub>2</sub> -NT@H <sub>2</sub> O | 0.08e            |

References:

[1] S. Zhao, J. Xue, W. Kang, Gas adsorption on MoS<sub>2</sub> monolayer from first-principles calculations, Chemical Physics Letters 595 (2014) 35-42.
